# Supplementary material for: Lipid droplet availability affects neural stem/progenitor cell metabolism and proliferation
Source: PubMed Central journal article supplement (PMC8692608; doi:10.1038/s41467-021-27365-7), 2021-12-21
Supplement: 41467_2021_27365_MOESM1_ESM.pdf [file 41467_2021_27365_MOESM1_ESM.pdf]

## Supplementary Information

### Lipid droplet availability affects neural stem/progenitor cell metabolism and proliferation

Mergim Ramosaj<sup>1\*</sup>, Sofia Madsen<sup>1\*</sup>, Vanille Maillard<sup>1</sup>, Valentina Scandella<sup>1</sup>, Daniel Sudria-Lopez<sup>1</sup>, Naoya Yuizumi<sup>2</sup>, Ludovic Telley<sup>3</sup> and Marlen Knobloch<sup>1</sup>✉

<sup>1</sup>Department of Biomedical Sciences, University of Lausanne, Lausanne, Switzerland. <sup>2</sup>Graduate School of Pharmaceutical Sciences, The University of Tokyo, Tokyo, Japan. <sup>3</sup>Department of Fundamental Neurosciences, University of Lausanne, Lausanne, Switzerland.

\*These authors contributed equally.

✉ [marlen.knobloch@unil.ch](mailto:marlen.knobloch@unil.ch)

This file contains 7 supplementary figures, figure legends and a supplementary table

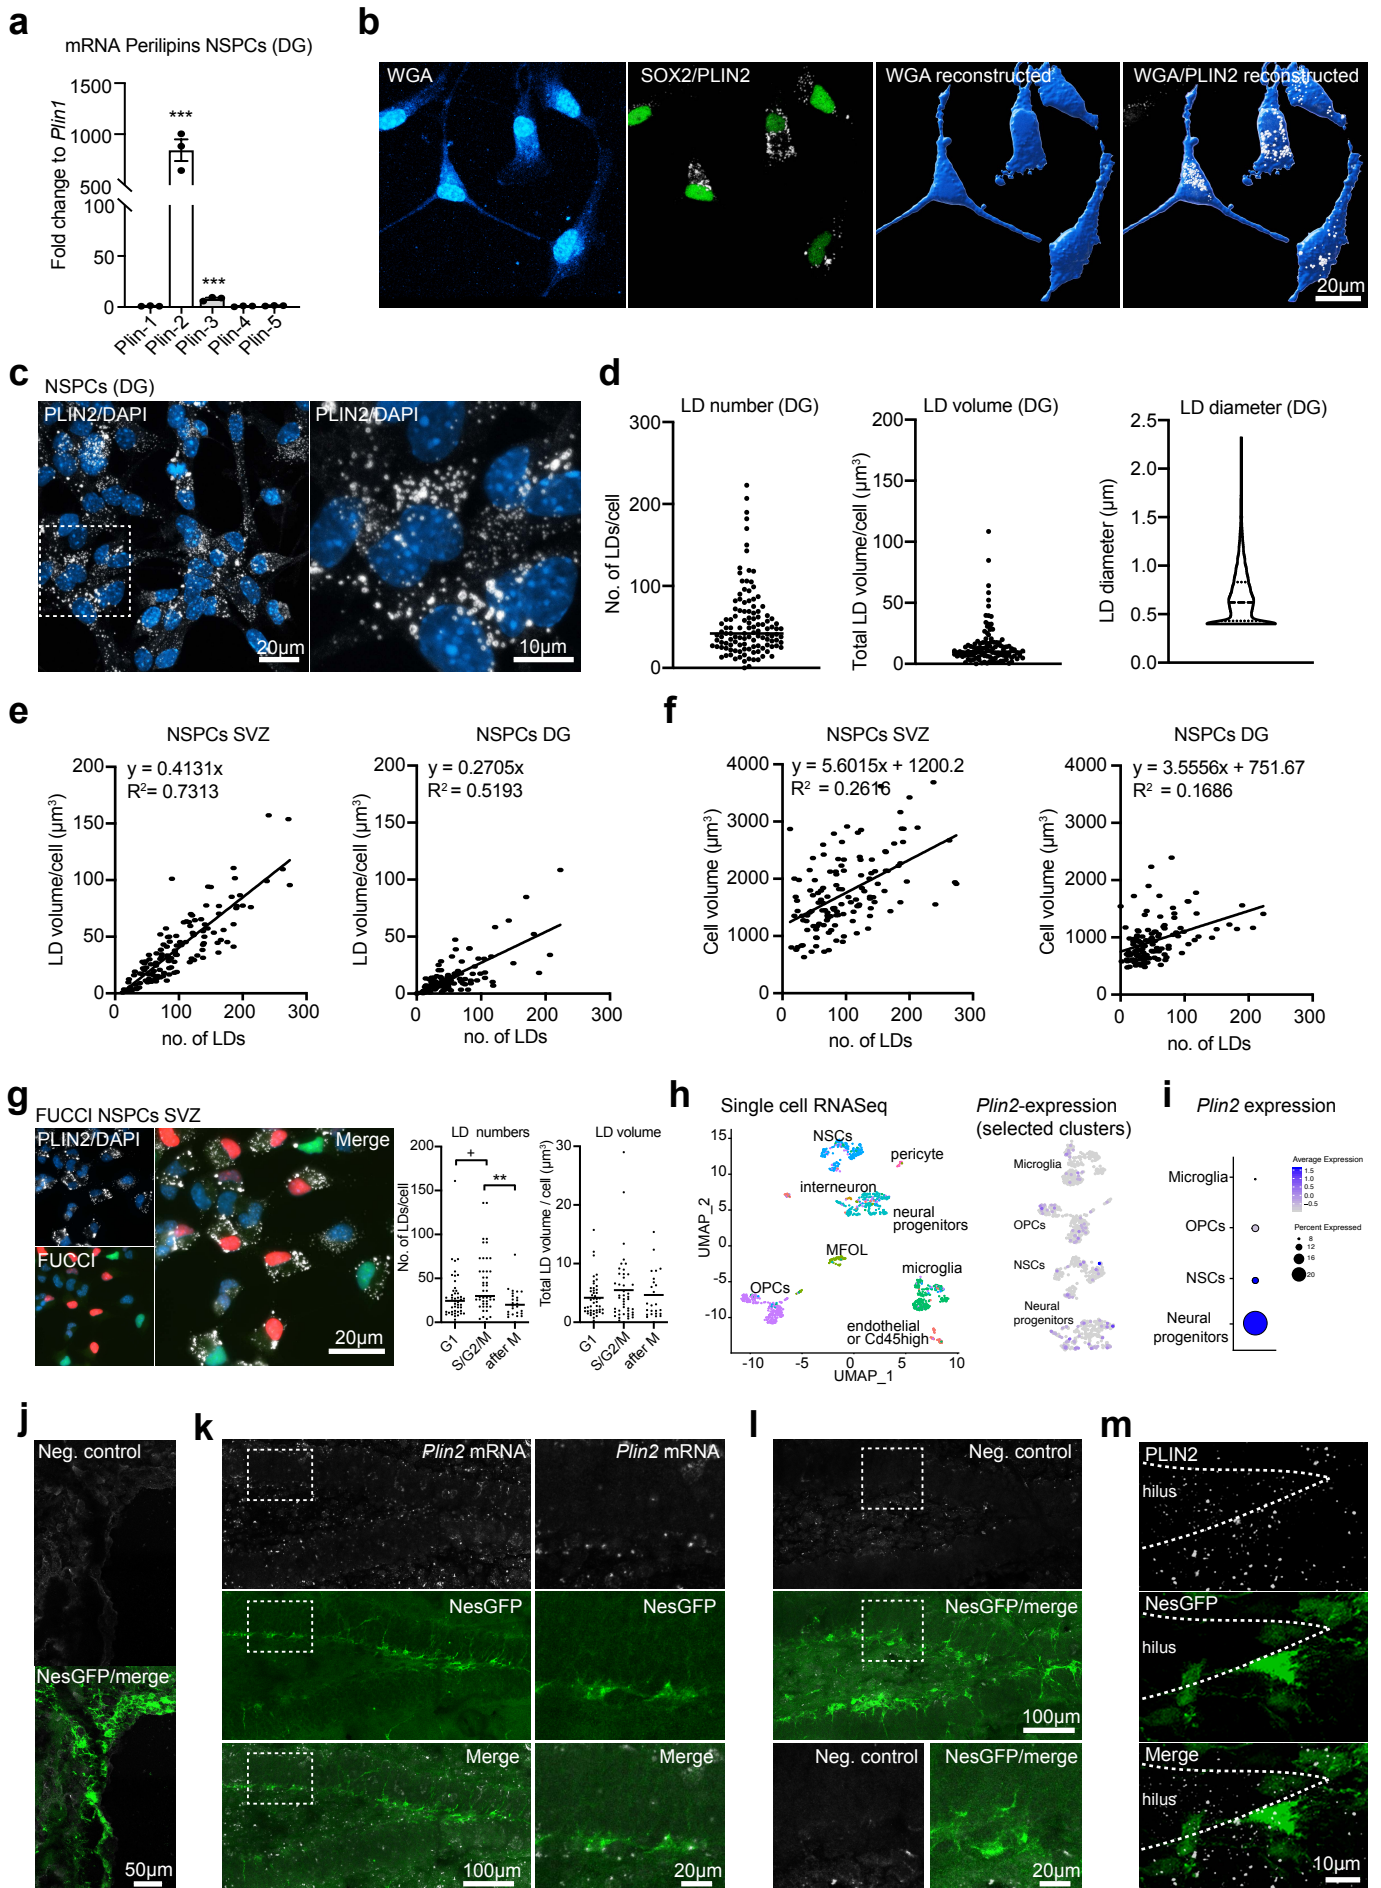

**Supplementary Figure 1: LDs are highly abundant in NSPCs, related to Figure 1.**

**a)** qRT-PCR shows that *Plin2* is the most abundant *Plin* expressed in proliferating DG NSPCs (n=3 samples, mean fold change versus *Plin1* +/- SEM, one-way ANOVA with Dunnett's multiple comparisons correction, p-values: *Plin2*<0.0001, *Plin3*=0.0002). **b)** 3D single cell reconstruction to analyse LD numbers, volumes and diameters. WGA (blue) outlines the cell, SOX2 marks the nucleus of NSPCs (green), PLIN2 visualizes LDs (white). Representative images are maximum intensity projections. **c)** PLIN2 (white) reveals a large variability in LD numbers and volume among neighbouring proliferating DG NSPCs. Representative images are maximum intensity projections. DAPI-positive nuclei (blue). Results were similar among 45 images from 3 coverslips **d)** Quantification of LD number, total LD volume and diameter confirms the variability shown in c. (n=120 cells from 3 coverslips). Each dot represents a cell. LD diameters are shown as a violin plot. **e)** LD numbers per cell correlate with total LD volume in NSPCs from SVZ and DG. **f)** Cell size weakly correlates with LD numbers in NSPCs. **g)** Proliferating FUCCI NSPCs, changing nuclear color with cell cycle, display a large variability of LDs (PLIN2, white) within each cell cycle stage. Representative images are maximum intensity projections. DAPI-positive nuclei (blue). Each dot represents a cell, medians are shown as a line. (One-way ANOVA, Tukey's multiple comparison test, G1 vs S/G2/M p-value=0.0506, after M vs S/G2/M p-value=0.008). **h)** Analysis of existing adult hippocampal niche single cell RNA seq data (Artegiani et al., 2017) shows that *Plin2* mRNA is expressed in NSPCs. UMAP of unsupervised clustering, and feature plot for *Plin2*. **i)** Expression analysis in the different clusters shows that *Plin2* is highest in NSPCs. **j)** *In situ* hybridisation using RNAscope shows no signal in the negative control in the ventricular zone/SVZ of Nestin-GFP mice. **k)** RNAscope shows *Plin2* expression in GFP positive cells in the DG in brain sections from Nestin-GFP mice. **l)** RNAscope negative control. **m)** PLIN2 (white) in the DG of a NestinGFP mouse (green) shows that LDs are present in this region. **For j-m:** Representative images are maximum intensity projections. Results were similar among n=3 NestinGFP mice. Asterisks indicate the following p-value: \*\*<0.01. \*\*\*<0.001. + indicates a p-value of 0.0506.

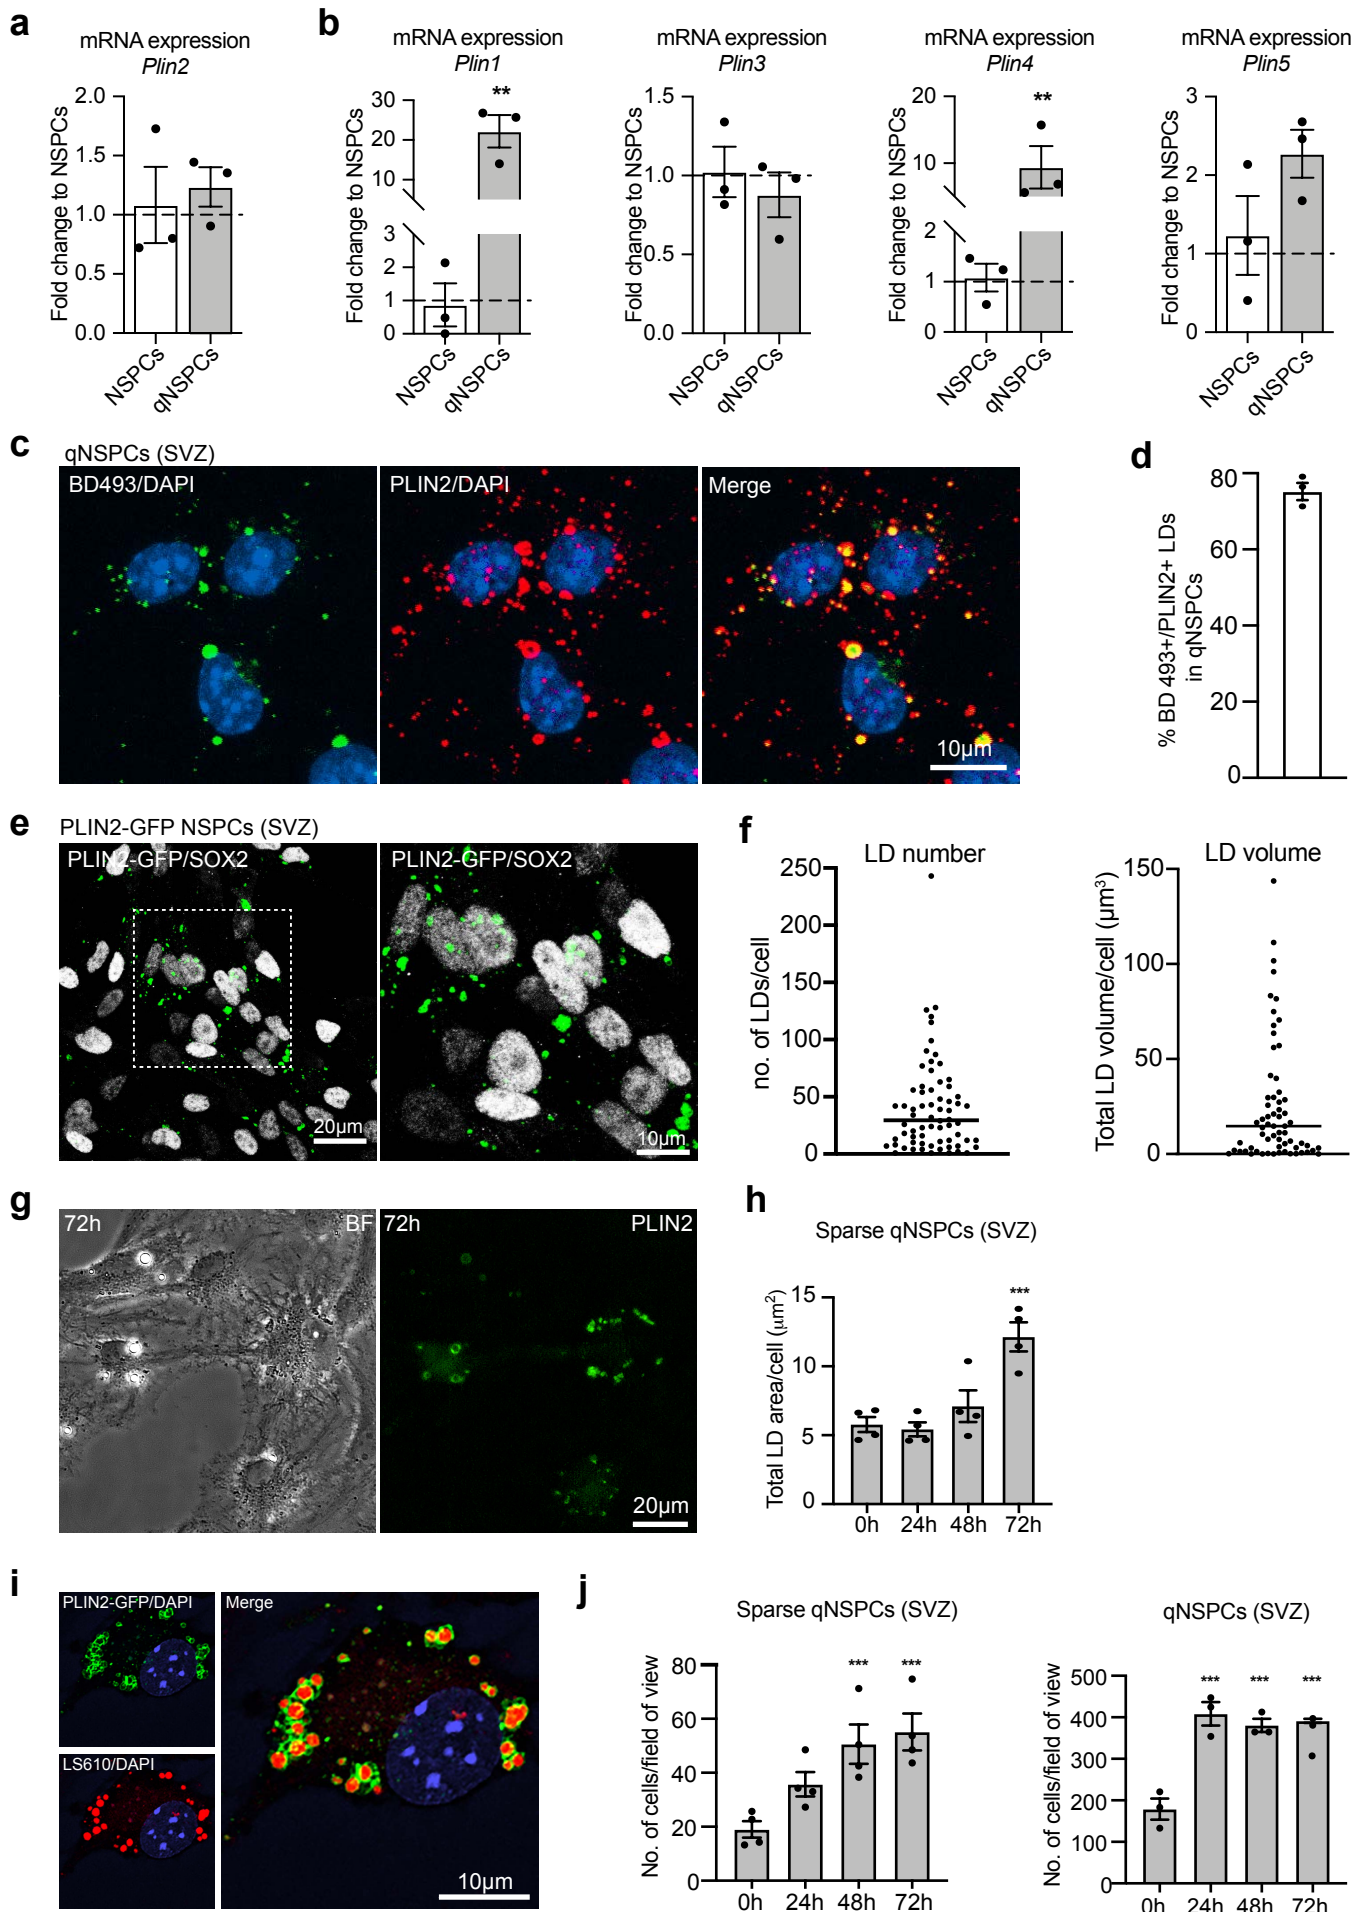

**Supplementary Figure 2: LD accumulation changes significantly with quiescence, related to Figure 2.**

**a)** qRT-PCR shows that *Plin2* is similarly expressed in proliferating and quiescent SVZ NSPCs (n=3 samples each condition, mean fold change +/- SEM, Mann-Whitney test, two-tailed, p=0.7). **b)** Among the other *Plin* family members, *Plin1* and *Plin4* were significantly upregulated with quiescence (n=3 samples each condition, mean fold change +/- SEM, unpaired t-tests, two-tailed, *Plin1* qNSPC vs NSPC p-value=0.0031, *Plin4* qNSPC vs NSPC p-value=0.0081). **c)** Co-staining of PLIN2 and BD493 shows co-localization of the two signals. Representative images are maximum intensity projections. DAPI-positive nuclei (blue). **d)** Quantification of the number of BD493/PLIN2 double positive LDs shows that 72.3% of BD493 positive LDs are also PLIN2 positive in quiescent SVZ NSPCs. (n=576 cells from 3 different coverslips, mean +/- SEM). **e)** Stable overexpression of a *Plin2-Gfp* fusion construct in proliferating SVZ NSPCs, leading to green fluorescent LDs. Representative images are maximum intensity projections. Nuclei are SOX2 positive (white). **f)** Quantification of the LD numbers and total LD volume in 3D reconstructed PLIN2-GFP NSPCs. Each dot represents a cell. **g)** Time-lapse analysis of sparsely plated PLIN2-GFP NSPCs during quiescence induction. Shown is a representative brightfield and fluorescent image at 72h after quiescence induction. **h)** Quantification of LDs over time revealed a significant increase in the number of LDs in sparsely plated quiescent NSPCs at 72h (n=3 wells, mean +/- SEM, one-way ANOVA, Tukey's multiple comparison test, p-value=0.0011 0h vs. 72h). **i)** PLIN2-GFP colocalises with the lipid dye Lipid Spot610 in quiescent PLIN2-GFP NSPCs, confirming that the large rings are LDs. Representative images are maximum intensity projections. **j)** Time-lapse analysis over 3 days of quiescence induction shows that NSPCs stop proliferating after 24h-48h. Bar graphs represent the mean +/- SEM of the number of cells per field of view at the indicated timepoints. (n=4 wells for sparse density, n=3 wells for normal density, one-way ANOVA, Tukey's multiple comparison test, p-value=0.0095 0h vs. 48h sparse, p-value=0.0036 0h vs. 48h sparse; p-value=0.0002 0h vs. 24h, p-value=0.0006 0h vs. 48h, p-value=0.0004 0h vs 72h). Asterisks indicate the following p-value: \*\*<0.01. \*\*\*<0.001.

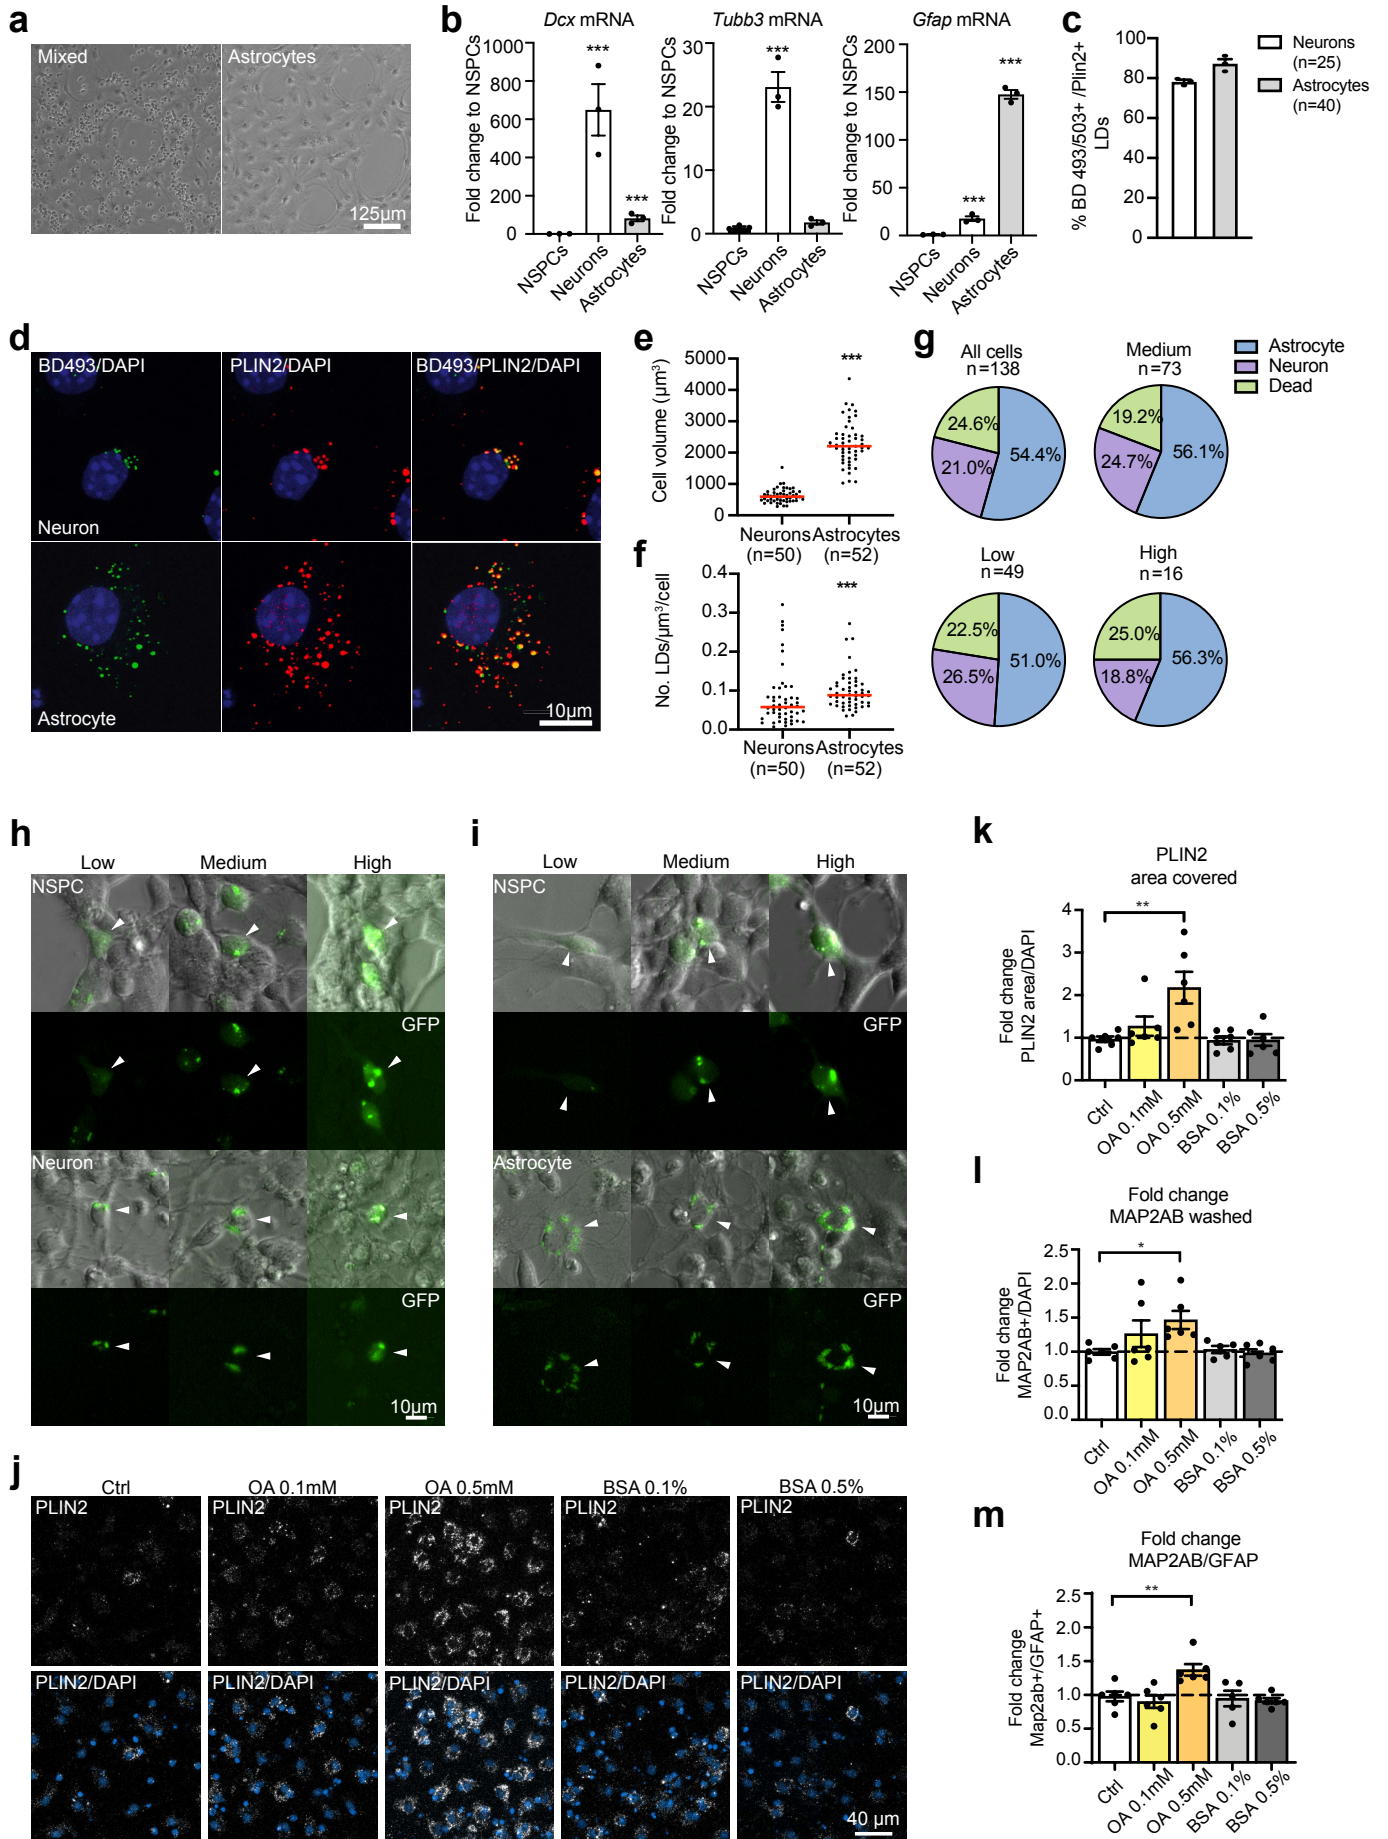

**Supplementary Figure 3: Neurons have significantly less LDs than astrocytes and artificially increasing LDs prior to NSPC differentiation leads to more neurons, related to Figure 3.**

**a)** Representative image before and after separation of differentiated NSPC progeny. Results were similar among n=3 samples per condition. **b)** qRT-PCR shows enrichment of neuronal genes (doublecortin (*Dcx*), beta 3 tubulin (*Tubb3*)) in the neuronal fraction, whereas the astrocytic marker glial fibrillary acidic protein (*Gfap*) is enriched in the astrocytic fraction (n=3 samples per condition, mean fold change +/- SEM, one-way ANOVA with Dunnett's multiple comparisons correction, *DCX* NSPCs vs. neurons and NSPCs vs. astrocytes p-value<0.0001; *Tubb3* NSPCs vs. neurons p-value<0.0001; *Gfap* NSPCs vs. neurons and NSPCs vs. astrocytes p-value<0.0001). **c)** Out of BD495/503 positive LDs, the majority are PLIN2 positive in astrocytes (87.3%) and neurons (78.2%). (n=25 neurons and n=40 astrocytes from 3 coverslips). Dots represent individual cells; the median is shown in red. **d)** Representative images are maximum intensity projections of a neuron and astrocyte co-stained for PLIN2 (red) and BD493/503 (green). Nuclei are blue. **e)** Cell volumes are significantly different between neurons and astrocytes. Dots represent individual cells; the median is shown in red. (n=50 neurons and 52 astrocytes from 3 coverslips, Mann-Whitney test, two-tailed, p-value<0.0001). **f)** LD numbers are still significantly higher in astrocytes when normalized to cell volume. Dots represent individual cells; the median is shown in red. (n=50 neurons and 52 astrocytes from 3 coverslips, Mann-Whitney test, two-tailed, p-value<0.0004). **g)** No significant difference in the proportion of cells becoming astrocytes, neurons or dying was observed among the low, medium and high PLIN2-GFP NSPCs in a differentiation time-lapse experiment. (n=138 individually followed cells from 4 wells from 2 experiments). **h and i)** Representative images of low, medium and high PLIN2-GFP NSPCs at beginning of differentiation (upper panel, arrowhead) and after becoming a neuron or an astrocyte respectively (lower panel, arrowhead). Results were similar among n=4 wells. **j)** Lipid loading of NSPCs leads to increased LDs (PLIN2, white) after differentiation. Nuclei are blue. **k)** Area covered by PLIN2 significantly increases in the 0.5mM OA condition. Bar graphs represent mean fold change +/- SEM. (n=6 coverslips from 2 experiments, one-way ANOVA, Holm-Sidak correction, p-value=0.0017). **l)** MAP2AB positive neurons also increased when lipid loaded or -effluxed NSPCs were washed prior to differentiation. Bar graphs represent mean fold change +/- SEM. (n=6 coverslips from 2 experiments, one-way ANOVA, Holm-Sidak correction, p-value=0.0317). **m)** The ratio of MAP2AB positive neurons to GFAP positive astrocytes increased with OA loading (n=6 coverslips from 2 experiments, bar graphs represent mean +/-SEM, one-way ANOVA, Holm-Sidak correction, p-value=0.0087).

Asterisks indicate the following p-value: \*<0.05. \*\*<0.01. \*\*\*<0.001.

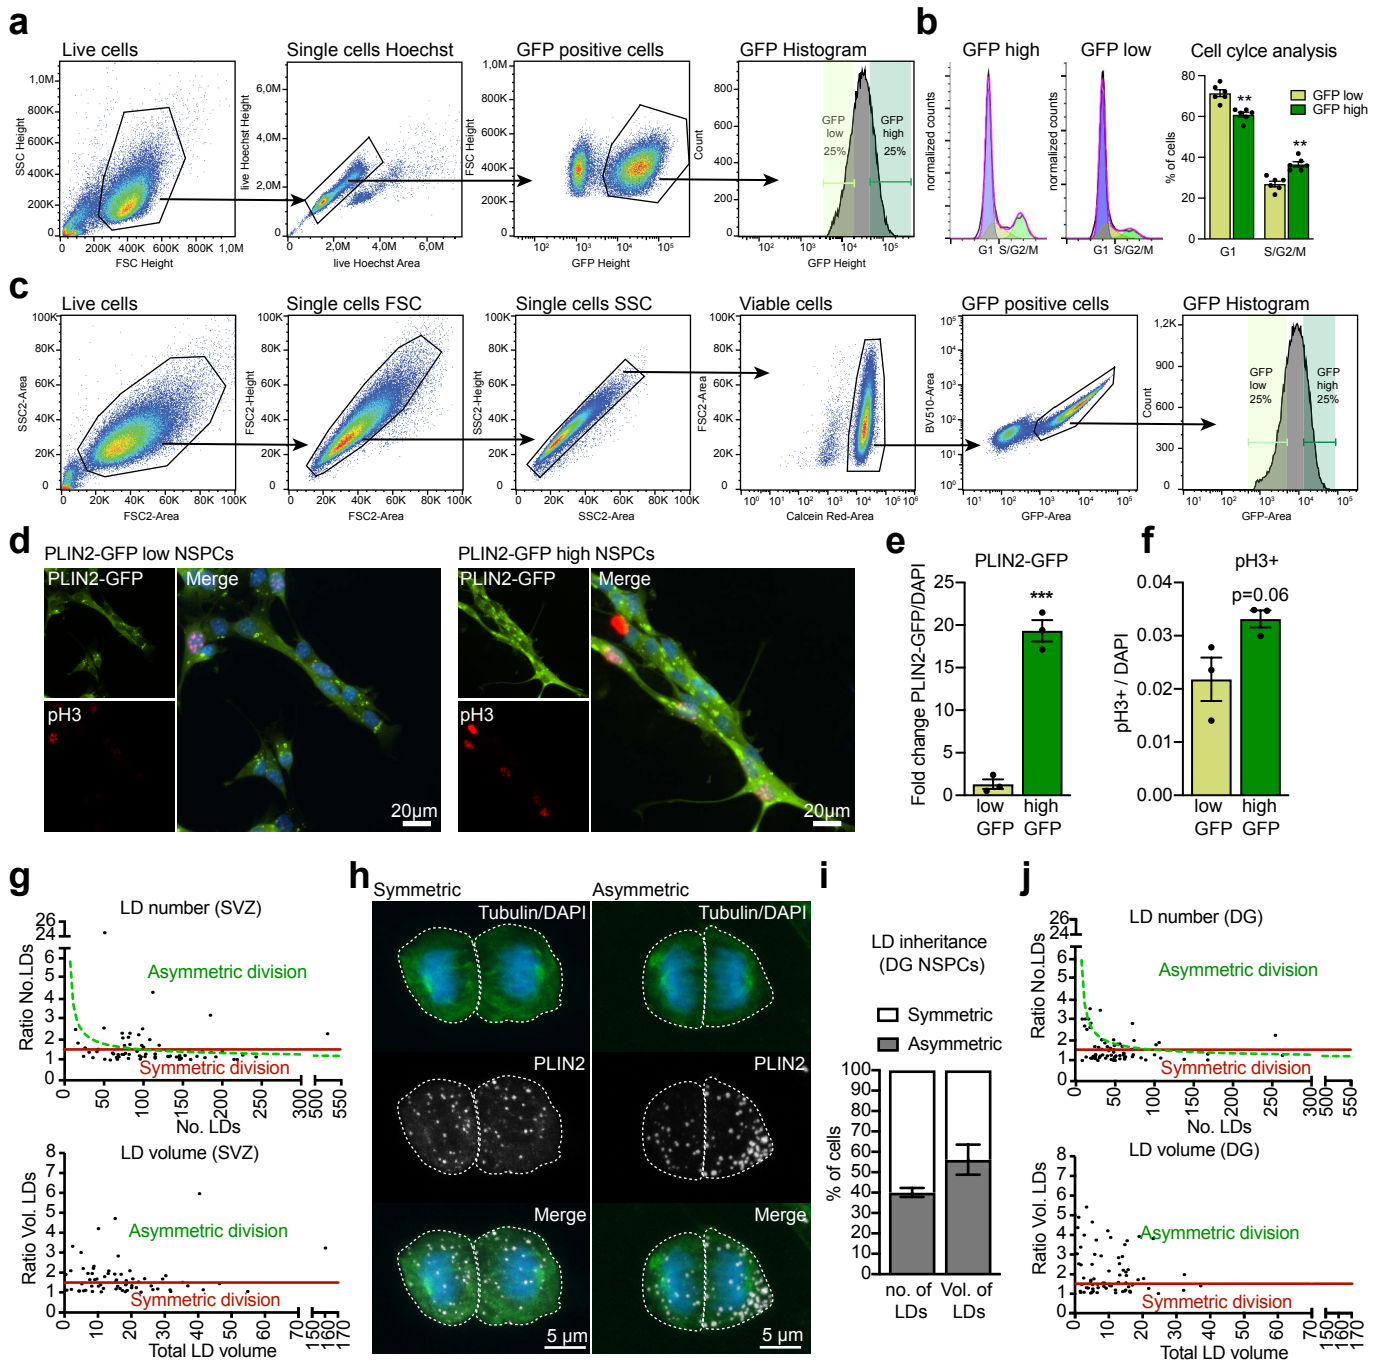



**Supplementary Figure 4: The total number of LDs as well as asymmetric LD inheritance influences NSPC proliferation, related to Figure 4.**

**a)** Cell cycle analysis of proliferating PLIN2-GFP SVZ NSPCs. Representative flow cytometry plots illustrate the gating strategy. **b)** Representative cell cycle profiles of GFP high and GFP low cells and the quantification of cells in G1 and S/G2/M. (n=6 samples from 3 experiments, paired t-test, two-tailed, p-value=0.0015). **c)** Flow cytometry-based separation of GFP low and GFP high PLIN2-GFP SVZ NSPCs. Representative flow cytometry plots illustrate the gating strategy. **d)** Proliferating GFP low and GFP high PLIN2-GFP NSPCs keep their GFP expression pattern. Epifluorescent images of the individual channels and a merge are shown. Mitotic cells are shown in red (pH3), Nuclei (blue) are stained with DAPI. **e)** Quantification of the area covered by PLIN2-GFP 48h after sorting showed a significant difference between the low GFP and high GFP cells (mean fold change +/- SEM, n=3 coverslips per condition, unpaired t-test, two-tailed, p-value=0.0002). **f)** Quantification of the number of pH3+ cells revealed a trend of increased proliferation in the GFP high NSPCs. (mean +/- SEM, n=3 coverslips per condition, unpaired t-test, two-tailed, p-value=0.0606). **g)** Paired-daughter cell analysis to study LD inheritance in SVZ NSPCs. Each cell is displayed as a dot. The red line represents the 40/60 ratio used (=1.5), for the LD numbers, the green dotted line represents the more stringent square root of n analysis. **h)** Representative images are maximum intensity projections of DG NSPC pairs in anaphase, having either symmetric (left panel) or asymmetric (right panel) LD inheritance (white). The mitotic spindle (green) is revealed with tubulin staining, DNA is stained with DAPI (blue). Results were similar among 3 coverslips. **i)** Quantification of LD inheritances shows that 40.1% of dividing NSPCs from the DG distributed the number of LDs asymmetrically. The percentage of asymmetry increased to 56.1 % when analysing total LD volume. (n=146 daughter cells (73 pairs) from 3 coverslips, mean +/- SEM). **j)** The same display of the paired-daughter cell analysis as shown in **h** shown here for the DG NSPCs. Asterisks indicate the following p-value: \*\*<0.01. \*\*\*<0.001.

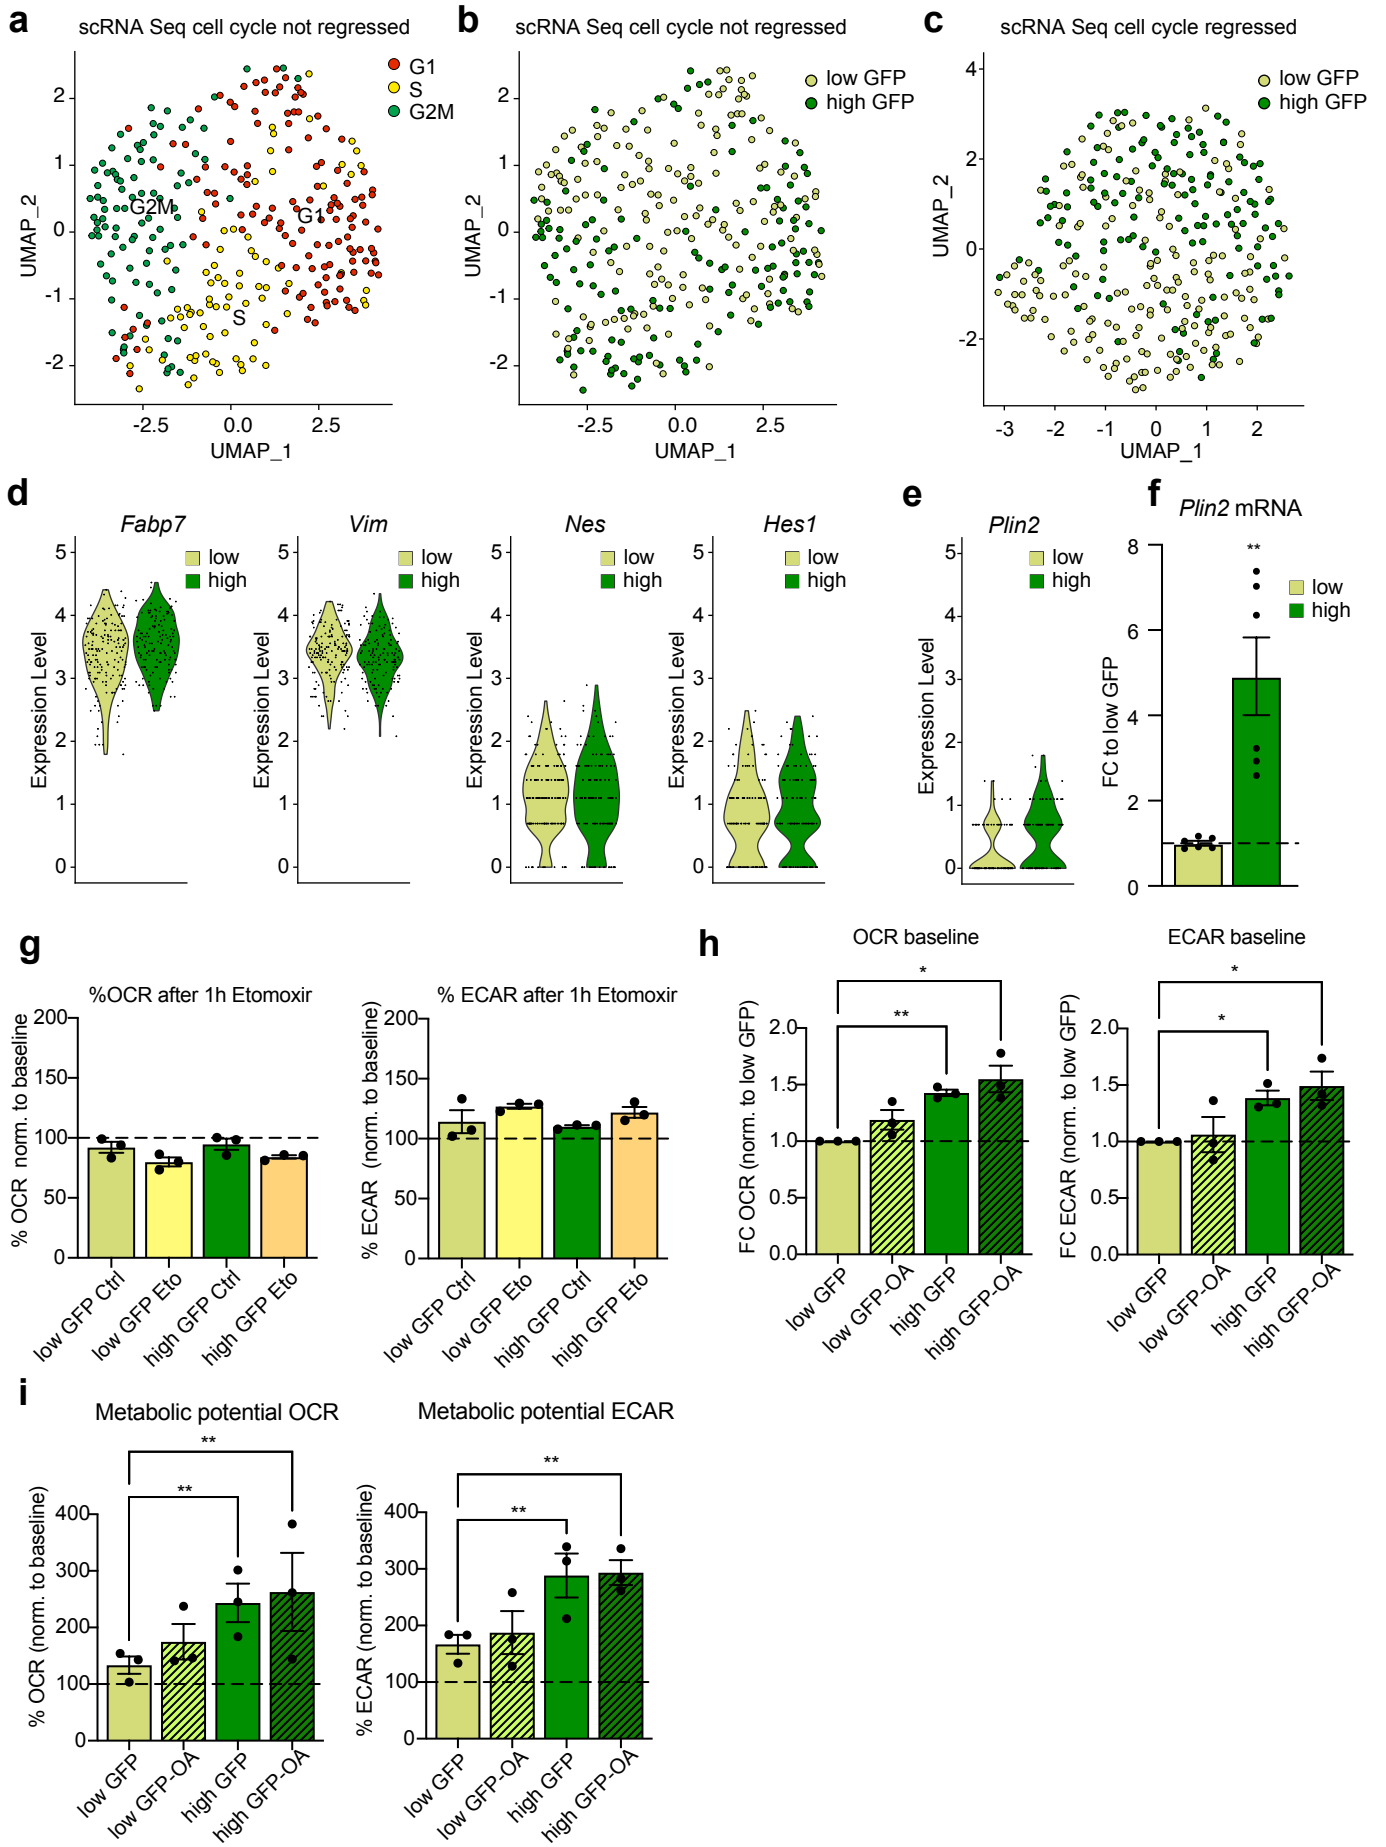

**Supplementary Figure 5: Single cell gene expression analyses and functional metabolic measurements reveal differences between low and high LD-containing NSPCs, related to Figure 5.**

**a)** scRNA Seq analysis comparing low and high LD-containing NSPCs shows that cells group together by cell cycle stage. Shown is a UMAP of all cells, G1 (red), S (yellow) or G2/M (green). **b)** The same UMAP as in a, displaying low and high PLIN2-GFP NSPCs, confirms that the number of LDs *per se* does not predict cell cycle phase. **c)** UMAP after cell cycle regression shows a regrouping of the low and high PLIN2-GFP NSPCs into two groups. **d)** Violin plots of the known NSPC markers fatty acid binding protein 7 (*Fabp7*), Nestin (*Nes*), Hairy/Enhancer of Split 1 (*Hes1*) and Vimentin (*Vim*) show similar expression in both populations. **e)** Violin plot of *Plin2* shows higher *Plin2* in the high PLIN2-GFP NSPCs. **f)** Confirmation of increased *Plin2* mRNA expression in bulk-sorted high PLIN2-GFP NSPCs, supporting that increased PLIN2-GFP protein levels are accompanied by increased *Plin2* mRNA levels (n=6 sorted samples per condition from 2 independent experiments, mean fold change +/- SEM, unpaired t-test, two-tailed, p-value<0.0001). **g)** Changes in OCR and ECAR after 1h treatment with the FAO inhibitor etomoxir. The OCR decrease and ECAR increase in low and high PLIN2-GFP NSPCs did not reach statistical significance (n=3 independent experiments, individual experiments are shown as dots, bars indicate the mean value +/-SEM, two-way ANOVA, non-significant). **h)** Pre-treatment of NSPCs with OA has only a mild and non-significant effect on OCR at baseline (left) and no effect on ECAR (right). The general differences in baseline OCR and ECAR between low and high PLIN2-GFP NSPCs are also confirmed in this experiment (n=3 independent experiments, individual experiments are shown as dots, bars indicate the mean value +/-SEM, two-way ANOVA, non-significant). **i)** Similarly, the metabolic potential in OCR is only mildly and non-significantly increased after OA (left) and has no effect on ECAR (right), whereas the difference between low and high PLIN2-GFP NSPCs is clearly confirmed (n=3 independent experiments, individual experiments are shown as dots, bars indicate the mean value +/-SEM, two-way ANOVA, Holm-Sidak correction, OCR p-value=0.0387 low GFP vs. high GFP; p-value=0.0294 low GFP vs. high GFP OA; ECAR p-value=0.007 low GFP vs. high GFP; p-value=0.007 low GFP vs. high GFP OA). Asterisks indicate the following p-value: \*<0.05. \*\*<0.01.

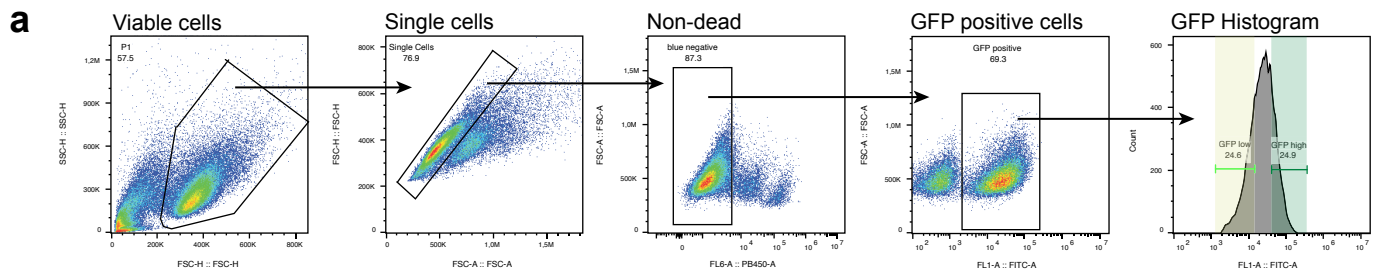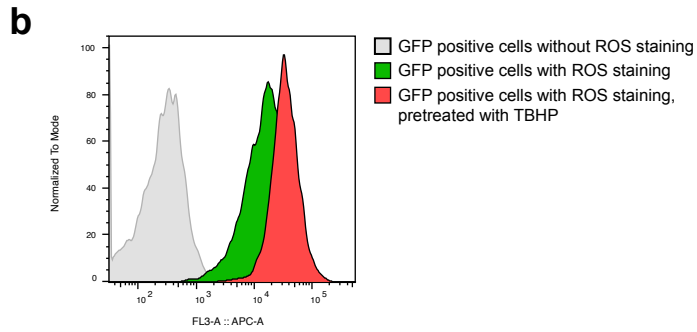

**Supplementary Figure 6: Higher ROS levels in the high LD-containing NSPCs do not lead to increased lipid peroxidation, related to Figure 6.**

**a)** ROS level analysis of proliferating PLIN2-GFP SVZ NSPCs. Representative flow cytometry plots illustrate the gating strategy. **b)** ROS intensity histogram of an unstained PLIN2-GFP sample (grey), a stained sample (green) and a sample pretreated with TBHP (red), which increases ROS levels. These controls confirm that the CellROX Deep red dye works as expected.

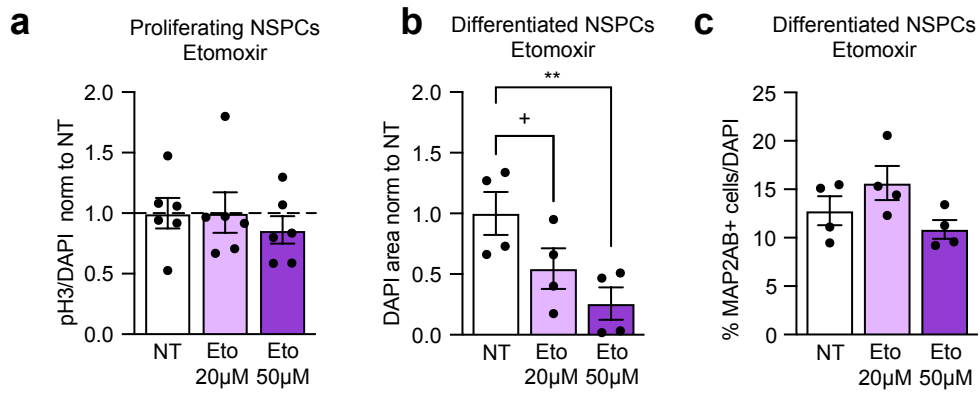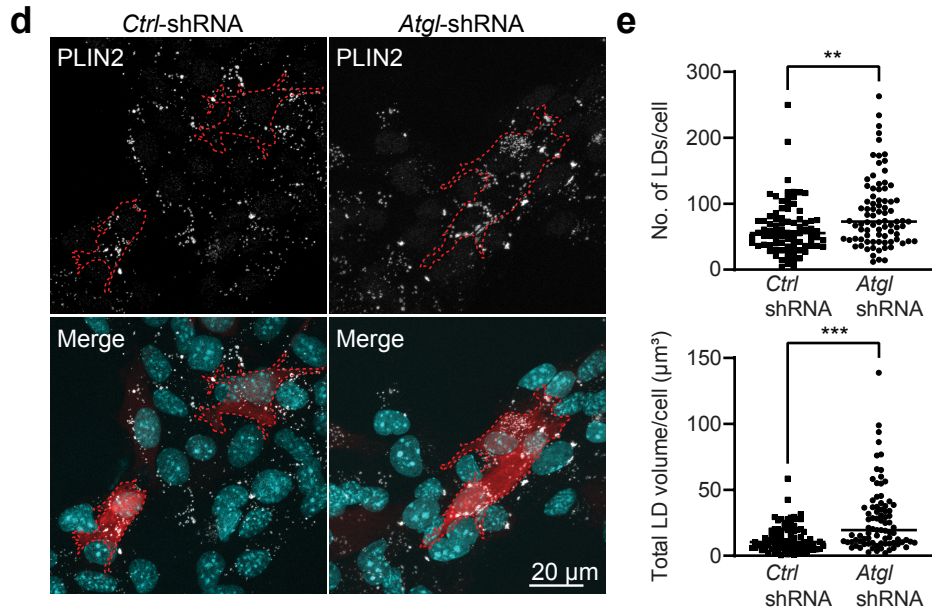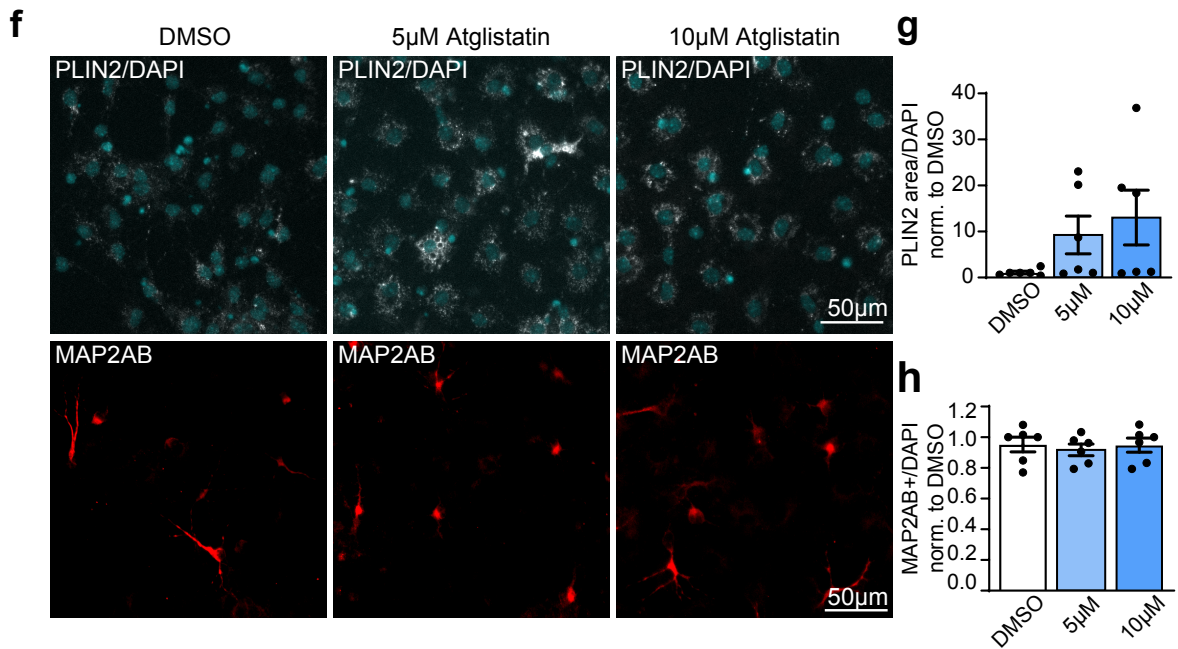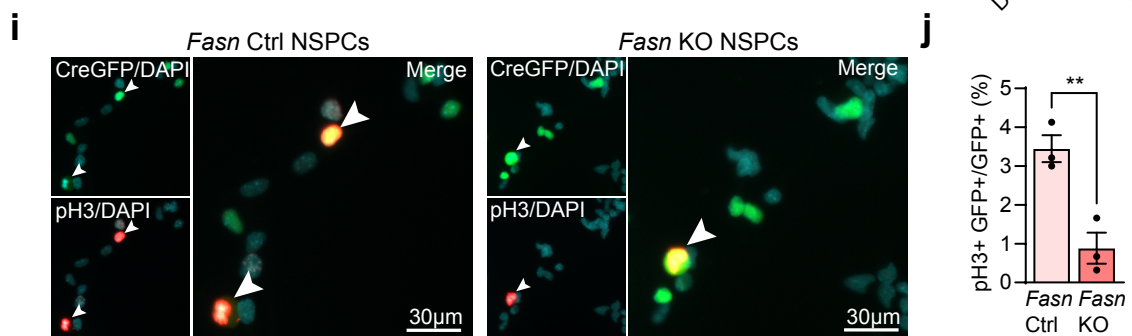

**Supplementary Figure 7: Manipulating the build-up or breakdown of LDs decreases NSPC proliferation, related to Figure 7.**

**a)** The ratio of pH3 positive NSPCs over all cells does not change with Etomoxir under proliferation conditions (n=6 coverslips shown as dots, from 3 independent experiments, bars indicate the mean value +/-SEM, one-way ANOVA; non-significant). **b)** The number of differentiated NSPCs, treated two days with Etomoxir, are significantly decreased (n=4 coverslips shown as dots, from 2 independent experiments, bars indicate the mean value +/-SEM, one-way ANOVA, Holm-Sidak correction, p-value=0.0764 NT vs 20 $\mu$ M, p-value=0.0191 NT vs 50 $\mu$ M). **c)** Despite decreased cell numbers, the proportion of MAP2AB+ cells does not change with etomoxir (n=4 coverslips shown as dots, bars indicate the mean value +/-SEM, one-way ANOVA, non-significant). **d)** Representative images are maximum intensity projections of *Ctrl*-shRNA and *Atgl*-shRNA transfected proliferating NSPCs (red). PLIN2 is shown in white. DAPI-positive nuclei (blue). **e)** Number of LDs and total volume of LDs significantly accumulate upon *Atgl*-knockdown compared to *Ctrl*-shRNA transfected NSPCs. (n= 83 *Atgl*-knockdown cells and 84 *Ctrl*-shRNA cells from 4 coverslips from 2 independent experiments, Mann Whitney test, two-tailed, p-value=0.0017 for LDs/cell, p-value<0.0001 for LD volume/cell). **f)** Representative images of differentiated NSPCs treated with Atglistatin the first two days of differentiation. PLIN2 (white), MAP2AB (red), DAPI (blue). **g)** PLIN2 area covered, normalized to cell numbers, shows a mild non-significant increase after Atglistatin treatment during the first two days of differentiation (n=9 coverslips shown as dots, from 3 independent experiments, bars indicate the mean value +/-SEM, one-way ANOVA, non-significant). **h)** The number of MAP2AB+ cells does not change with Atglistatin (n=9 coverslips shown as dots, from 3 independent experiments, bars indicate the mean value +/-SEM, one-way ANOVA, non-significant). **i)** Representative images of *Fasn* Ctrl NSPCs and *Fasn* KO NSPCs, 4 days after infection with a Cre-GFP virus (green). Mitotic cells are shown by pH3 (red, arrowheads). **j)** The number of pH3+ NSPCs among Cre-GFP+ NSPCs significantly decreases in *Fasn* KO NSPCs (n=3 coverslips, from 3 independent experiments, bars indicate the mean value +/-SEM, t-test, two-sided, p-value=0.0084). Asterisks indicate the following p-value: \*<0.05. \*\*<0.01. \*\*\*<0.001. +=0.0764.

| <b>Antibody</b>       | <b>Species</b> | <b>Dilution</b> | <b>Provider</b>       | <b>Protocol used</b> |
|-----------------------|----------------|-----------------|-----------------------|----------------------|
| GFP                   | Chicken        | 1:500           | Abcam (ab13970)       | Triton               |
| SOX2                  | Goat           | 1:500           | RnD systems (AF2018)  | Saponin              |
| PLIN2                 | Rabbit         | 1:1000          | Abcam (ab52356)       | Saponin              |
| TUBULIN- $\alpha$     | Rat            | 1:1000          | Bio-Rad (MCA77G)      | Saponin              |
| phospho<br>HISTONE H3 | Mouse          | 1:1000          | Abcam (ab14955)       | Triton               |
| RFP                   | Rabbit         | 1:500           | Abcam (ab62341)       | Triton               |
| MAP2AB                | Mouse          | 1:500           | Sigma (M2320)         | Triton and Saponin   |
| GFAP                  | Chicken        | 1:500           | Aves Lab (GFAP)       | Triton and Saponin   |
| 4-HNE                 | Mouse          | 1 :250          | RnD systems (Mab3249) | Triton               |

**Table 1:** Antibodies used in this study
